# Supplementary material for: Breynia cernua: Chemical Profiling of Volatile Compounds in the Stem Extract and Its Antioxidant, Antibacterial, Antiplasmodial and Anticancer Activity In Vitro and In Silico
Source: MDPI journal article supplement (doi:10.3390/metabo13020281), 2023-02-15
Supplement: s1 [file s1]

# ***Breynia cernua*: Chemical Profiling of Volatile Compounds in the Stem Extract and Its Antioxidant, Antibacterial, Antiplasmodial, and Anticancer Activity In Vitro and In Silico**

Hesti Lina Wiraswati <sup>1,2,3,4,\*</sup>, Nisa Fauziah <sup>1,2,3</sup>, Gita Widya Pradini <sup>1,3</sup>, Dikdik Kurnia <sup>5</sup>, Reza Abdul Kodir <sup>6</sup>, Afiat Berbudi <sup>1,2,3</sup>, Annisa Retno Arimdayu <sup>4</sup>, Amila Laelalugina <sup>4</sup>, Supandi <sup>7,8</sup> and Ilma Fauziah Ma'ruf <sup>4,9</sup>

<sup>1</sup> Department of Biomedical Sciences, Faculty of Medicine, Universitas Padjadjaran, Sumedang 45363, Indonesia

<sup>2</sup> Advance Biomedical Laboratory, Faculty of Medicine, Universitas Padjadjaran, Bandung 40161, Indonesia

<sup>3</sup> Infection Working Group, Faculty of Medicine, Universitas Padjadjaran, Sumedang 45363, Indonesia

<sup>4</sup> Oncology and Stem Cell Working Group, Faculty of Medicine, Universitas Padjadjaran, Bandung 40161, Indonesia

<sup>5</sup> Departement of Chemistry, Faculty of Mathematics and Natural Sciences , Universitas Padjadjaran, Sumedang 45363, Indonesia

<sup>6</sup> Pharmacy Study Program, Faculty of Mathematics and Natural Sciences, Universitas Islam Bandung, Bandung 40116, Indonesia

<sup>7</sup> PT. Borneo Indobara, Central Jakarta 10350, Indonesia

<sup>8</sup> Department of Mining Engineering, Faculty of Technology Mineral, Institut Teknologi Nasional Yogyakarta, Sleman 55281, Indonesia

<sup>9</sup> Biochemistry Research Group, Department of Chemistry, Faculty of Mathematics and Natural Sciences, Institut Teknologi Bandung, Bandung 40132, Indonesia

\* Correspondence: hesti.lina@unpad.ac.id

---

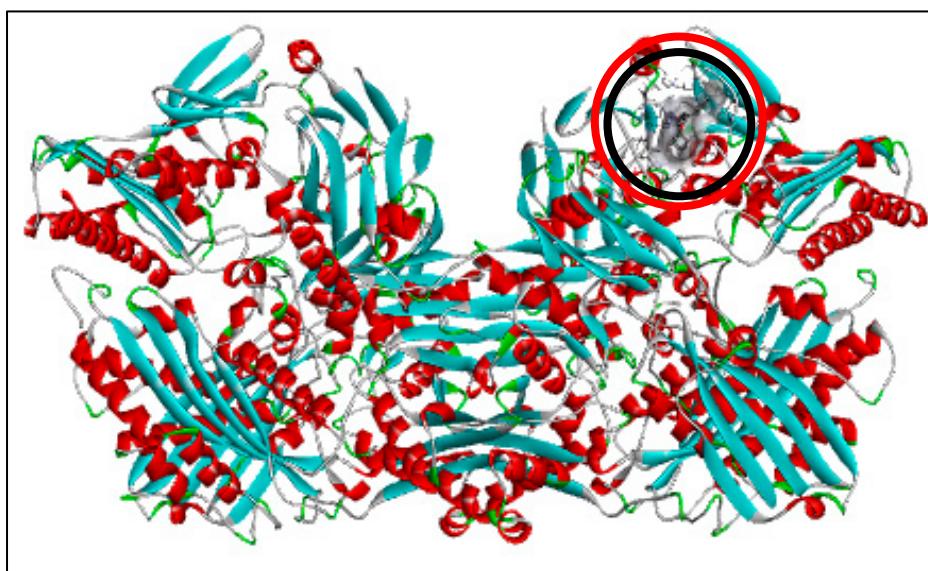

(a)

---

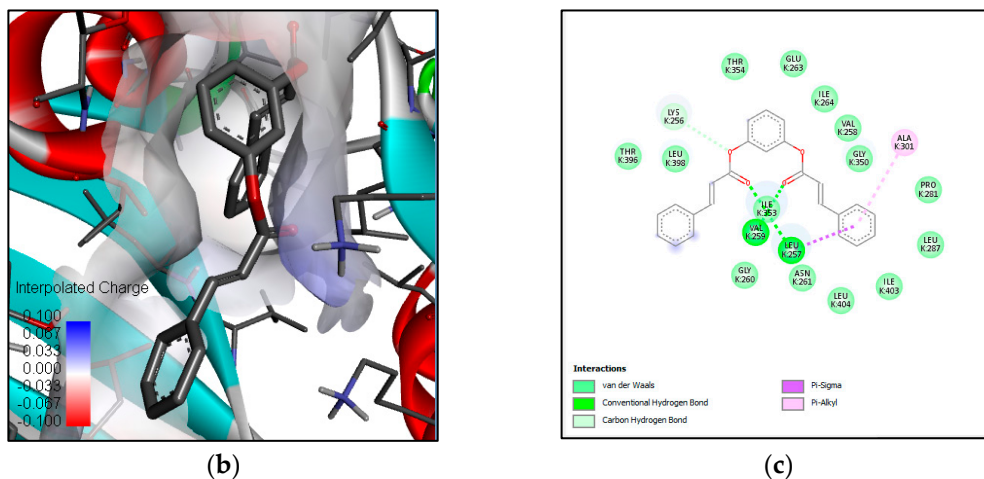

**Figure S1.** Binding interaction of 1,3-Phenylene, bis(3-phenylpropenoate) compound with antioxidant target protein (3EUB) based on the binding energy generated by PyRx program. A: (a) close-up view of ligand binding on 3EUB (binding site of native ligand and docked ligand were indicated by red and black circle respectively); (b) 3D diagram of ligand-protein binding pose; (c) 2D interaction of ligand-protein

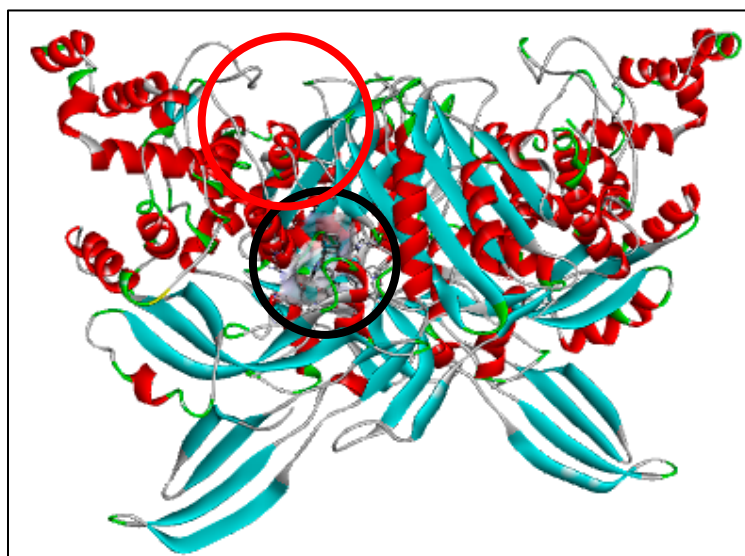

(a)

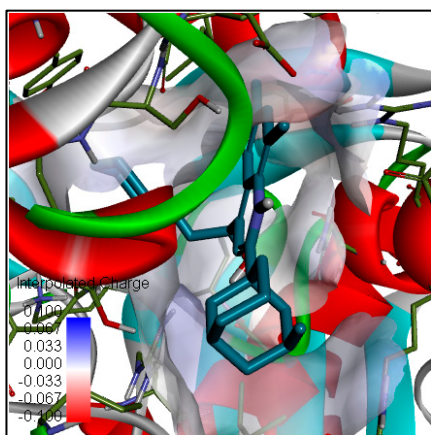

(b)

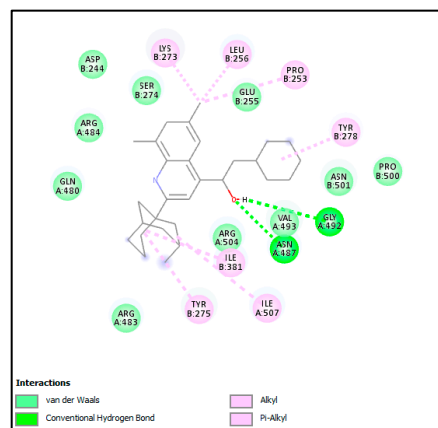

(c)

**Figure S2.** Binding interaction of N-[.beta.-Hydroxy-.beta.-[4-[1-adamantyl-6,8-dichloro]quinoly]ethyl] piperidine compound with antibacterial target protein (3VSL) based on the binding energy generated by PyRx program: (a) a close-up view of ligand binding on 3VSL (binding site of native ligand and docked ligand were indicated by red and black circle respectively); (b) 3D diagram of ligand-protein binding pose; (c) 2D interaction of ligand-protein

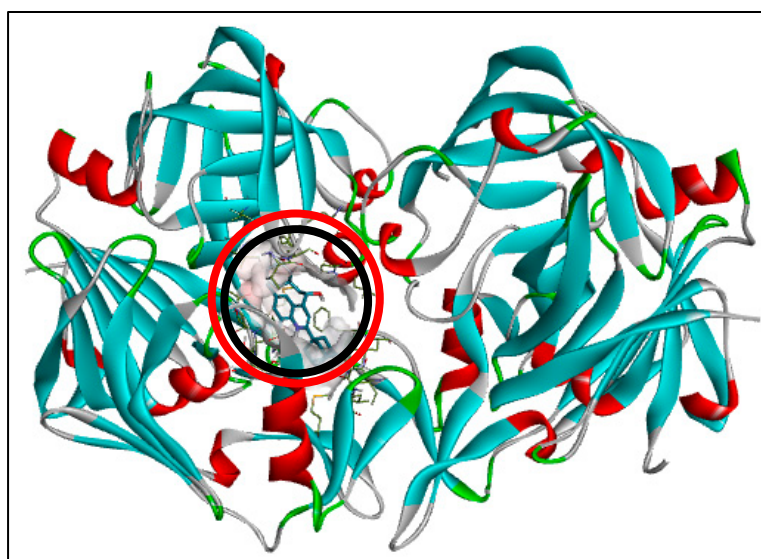

(a)

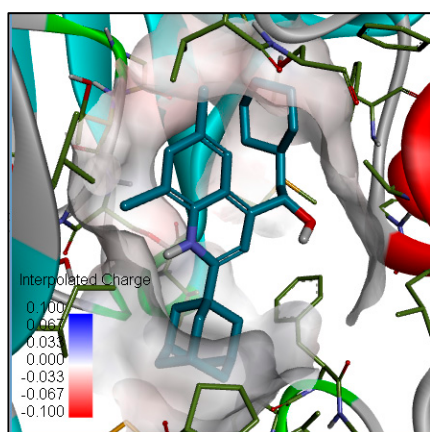

(b)

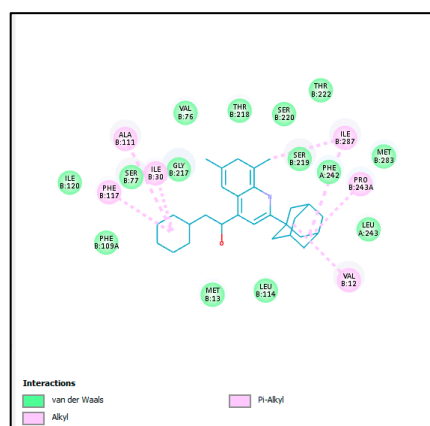

(c)

**Figure S3.** Binding interaction of N-[.beta.-Hydroxy-.beta.-[4-[1-adamantyl-6,8-dichloro]quinolyl]ethyl]

piperidine compound with antiparasmodial target protein (3QS1) based on the binding energy generated by PyRx program: (a) a close-up view of ligand binding on 3QS1 (binding site of native ligand and docked ligand were indicated by red and black circle respectively); (b) 3D diagram of ligand-protein binding pose; (c) 2D interaction of ligand-protein

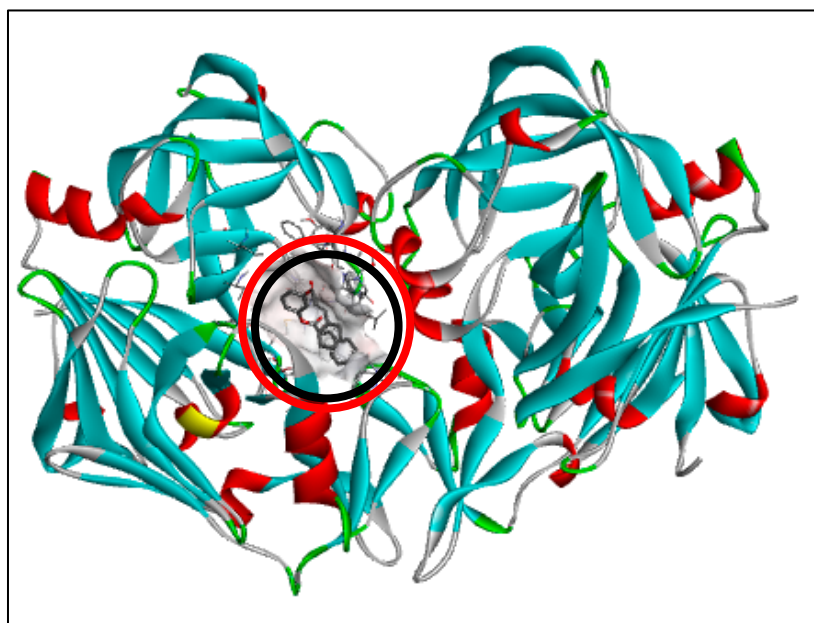

(a)

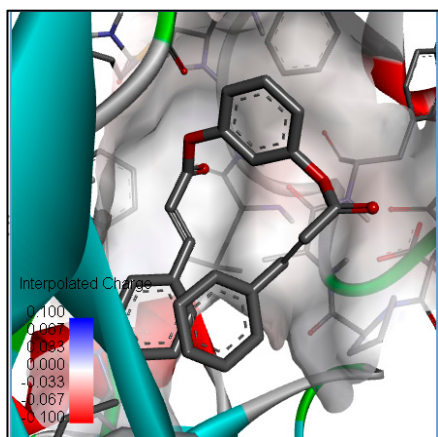

(b)

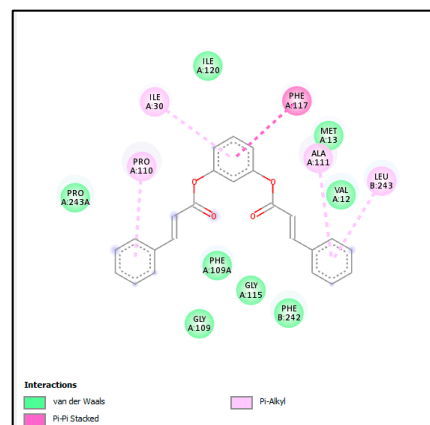

(c)

**Figure S4.** Binding interaction of 1,3-Phenylene, bis(3-phenylpropenoate) compound with antiplasmodial target protein (3QS1) based on the binding energy generated by PyRx program: (a) a close-up view of ligand binding on 3QS1 (binding site of native ligand and docked ligand were indicated by red and black circle respectively); (b) 3D diagram of ligand-protein binding pose; (c) 2D interaction of ligand-protein



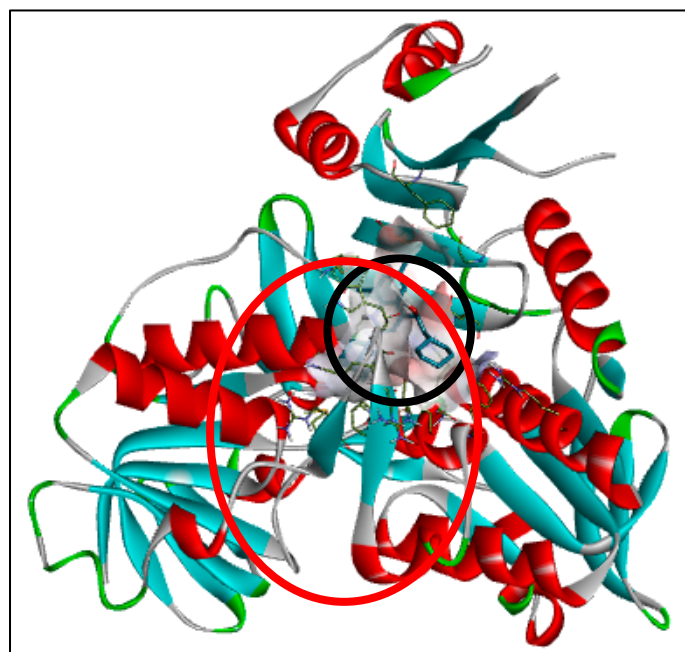

(a)

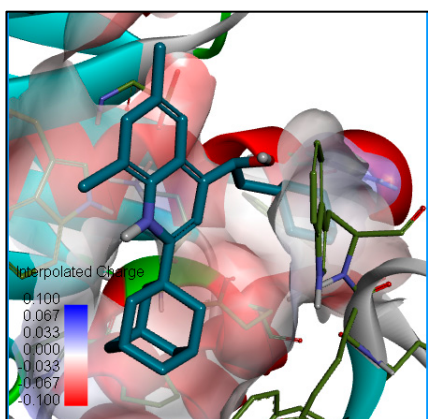

(b)

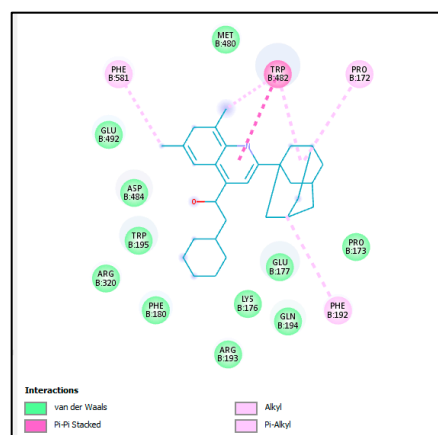

(c)

**Figure S5.** Binding interaction of N-[.beta.-Hydroxy-.beta.-[4-[1-adamantyl]-6,8-dichloro]quinolyl]ethyl] piperidine compound with anticancer target protein (3GD4) based on the binding energy generated by PyRx program: (a) a close-up view of ligand binding on 3GD4 (binding site of native ligand and docked ligand were indicated by red and black circle respectively); (b) 3D diagram of ligand-protein binding pose; (c) 2D interaction of ligand-protein

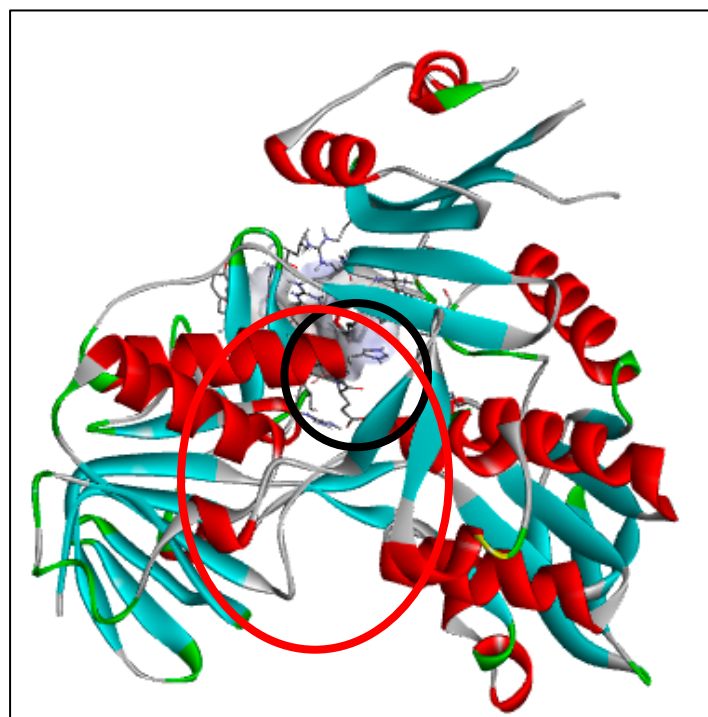

(a)

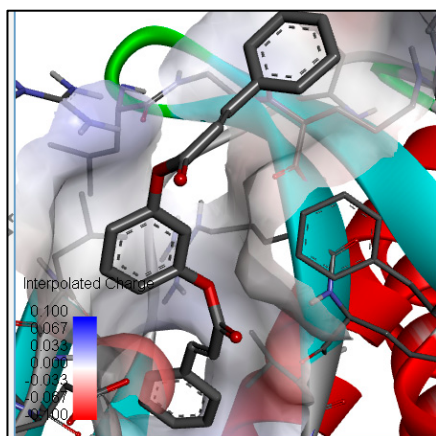

(b)

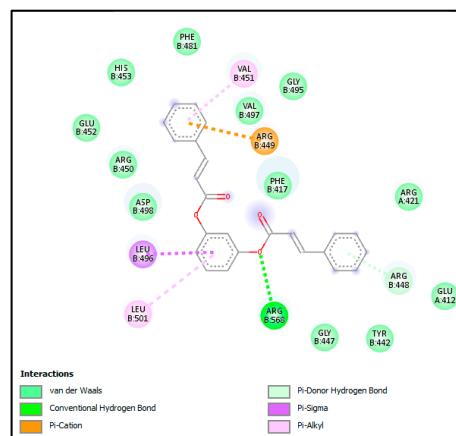

(c)

**Figure S6.** Binding interaction of 1,3-Phenylene, bis(3-phenylpropenoate) compound with anti-cancer target protein (3GD4) based on the binding energy generated by PyRx program: (a) a close-up view of ligand binding on 3GD4 (binding site of native ligand and docked ligand were indicated by red and black circle respectively); (b) 3D diagram of ligand-protein binding pose; (c). 2D interaction of ligand-protein

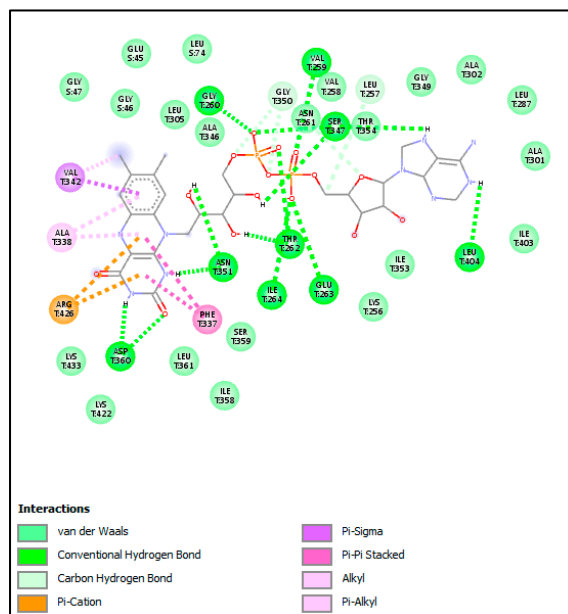

(a)

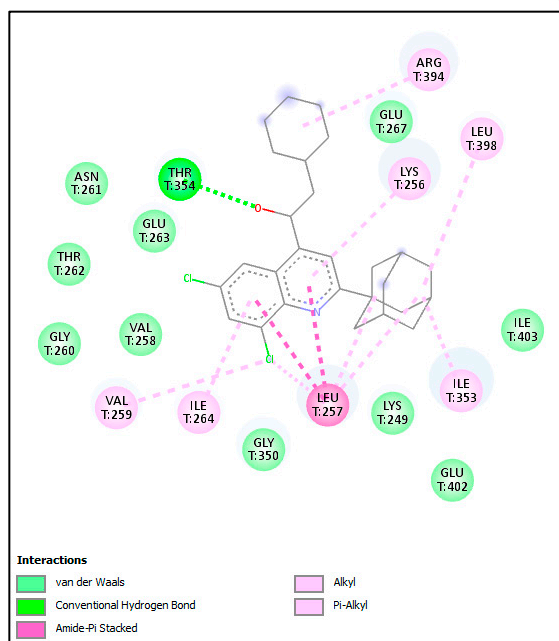

(b)

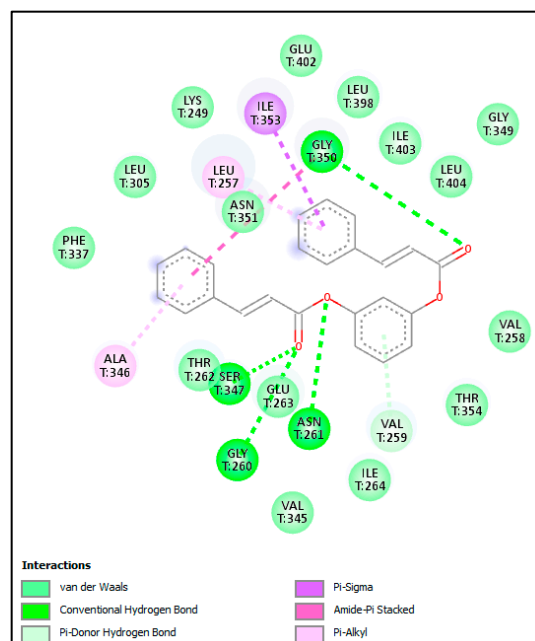

(c)

**Figure S7.** 2D interaction of Antioxidant protein target (3EUB) and ligands: (a) FLAVIN ADENINE DINUCLEOTIDE (native ligand); (b) N-[.beta.-Hydroxy-.beta.-[4-[1-adamantyl]-6,8-dichloro]quinolyl]ethyl]piperidine; (c) 1,3-Phenylene, bis(3-phenyl)propenoate)



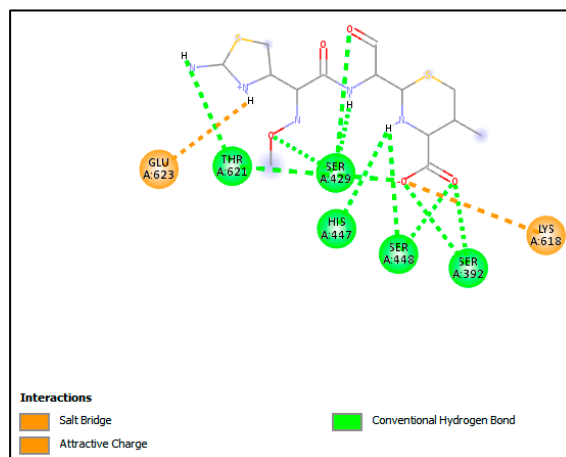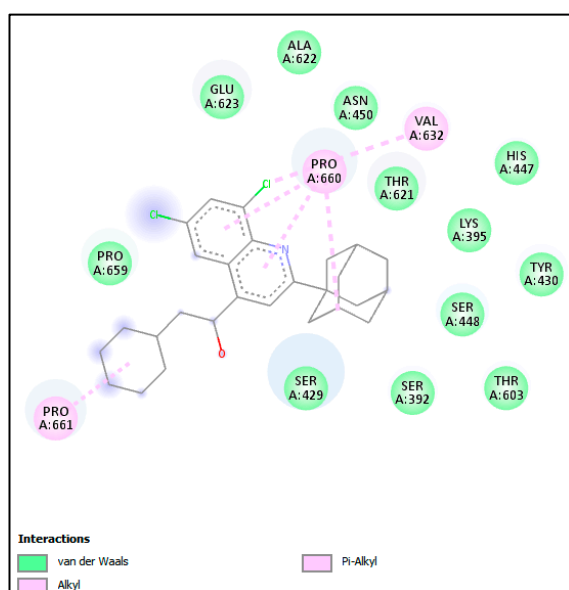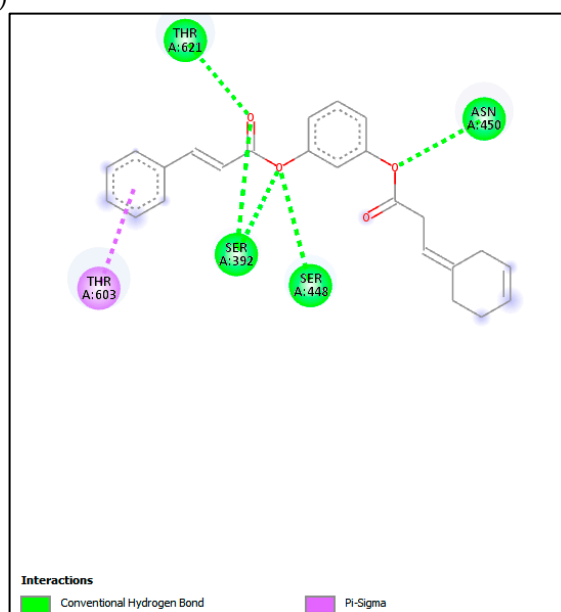

**Figure S8.** 2D interaction of Antibacterial protein target (3VSL) and ligands: (a) CEFOTAXIME (native ligand) (b) N-[.beta.-Hydroxy-.beta.-[4-[1-adamantyl-6,8-dichloro]quinolyl]ethyl]piperidine; (c) 1,3-Phenylene, bis(3-phenylpropenoate)

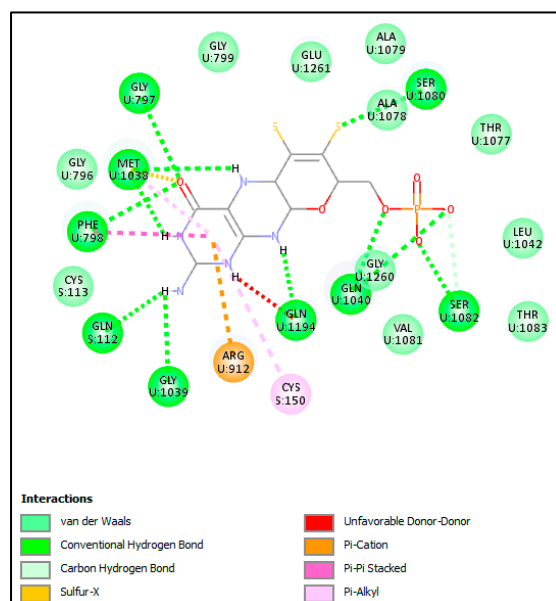

(a)

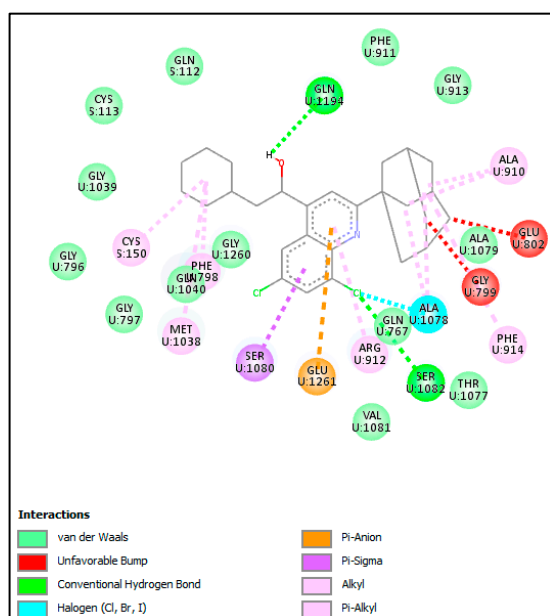

(b)

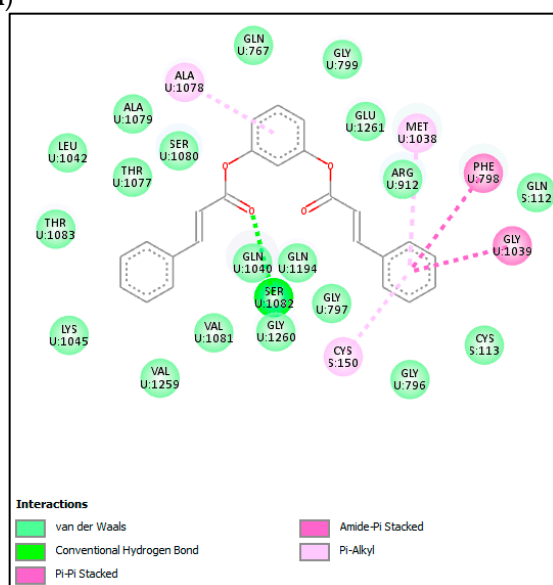

(c)

**Figure S9.** 2D interaction of Antioxidant protein target (3EUB) and ligands: **(a)** PHOSPHONIC ACIDMONO-(2-AMINO-5,6-DIMERCAPTO-4-OXO-3,7,8A,9,10,10A-HEXAHYDRO-4H-8-OXA-1,3,9,10-TETRAAZA-ANTHRACEN-7-YLMETHYL)ESTER (native ligand); **(b)** N-[.beta.-Hydroxy-.beta.-[4-[1-adamantyl-6,8-dichloro]quinolyl]ethyl]piperidine; **(c)** 1,3-Phenylene, bis(3-phenylpropenoate)

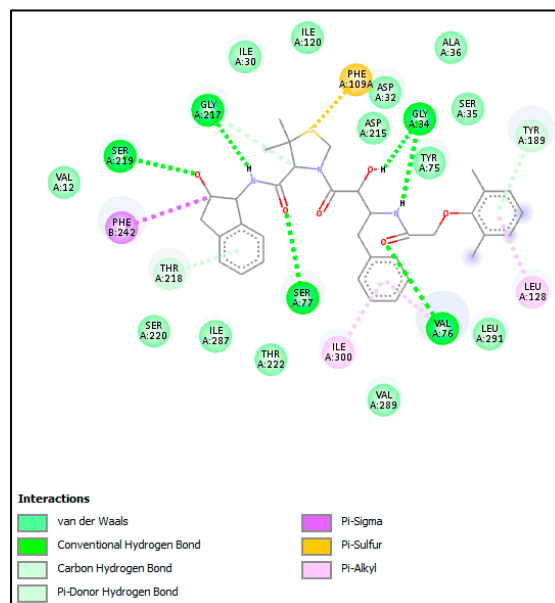

(a)

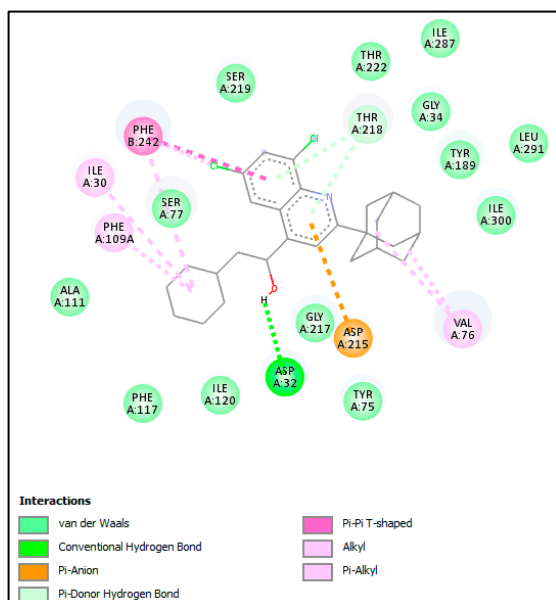

(b)

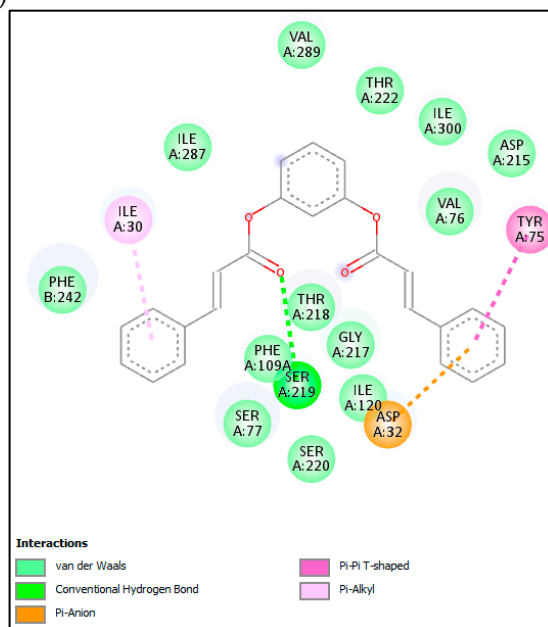

(c)

**Figure S10.** 2D interaction of Antiplasmodial protein target (3QS1) and ligands: (a) (4R)-3-[(2S,3S)-3-[[[(2,6-dimethylphenoxy)acetyl]amino]-2-hydroxy-4-phenylbutanoyl]-N-[(1S,2R)-2-hydroxy-2,3-dihydro-1H-inden-1-yl]-5,5-dimethyl-1,3-thiazolidine-4-carboxamide (native ligand); (b) N-[.beta.-Hydroxy-.beta.-[4-[1-adamantyl-6,8-dichloro]quinolyl]ethyl]piperidine; (c) 1,3-Phenylene, bis(3-phenylpropenoate)

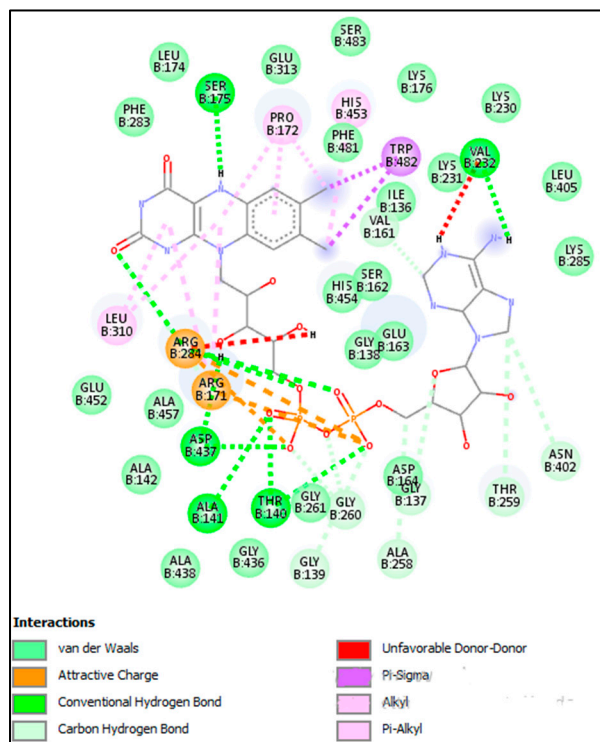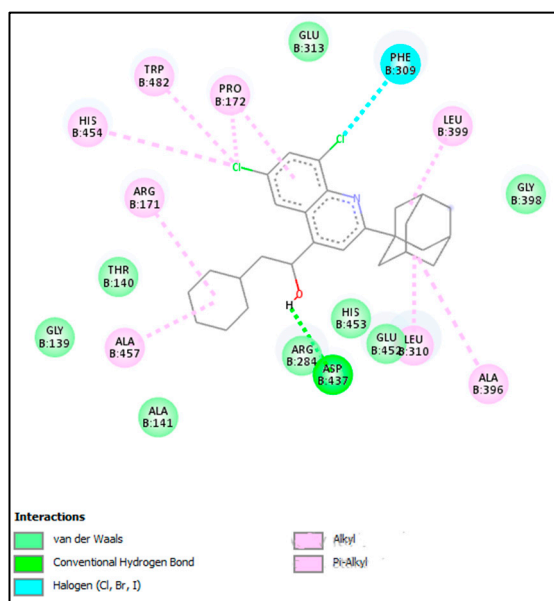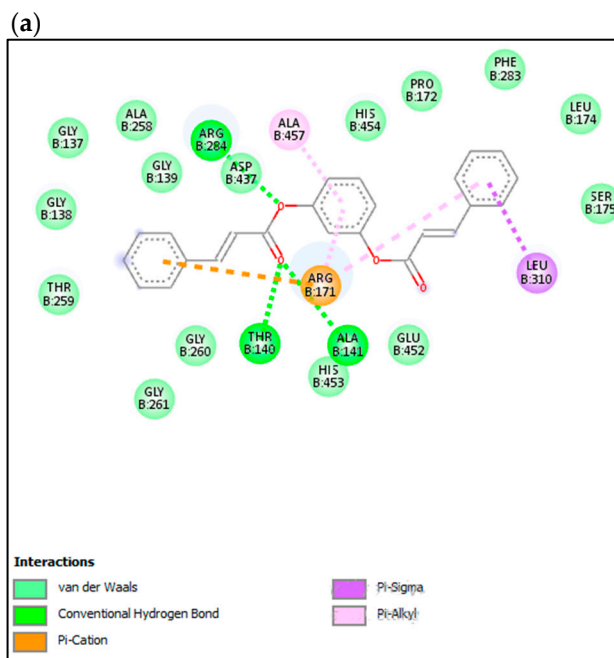

(b)

(c)

**Figure S11.** 2D interaction of Anticancer protein target (3GD4) and ligands; (a) FLAVIN ADENINE DINUCLEOTIDE (native ligand); (b) N-[.beta.-Hydroxy-.beta.-[4-[1-adamantyl-6,8-dichloro]quinolyl]ethyl]piperidine; (c) 1,3-Phenylene, bis(3-phenylpropenoate)

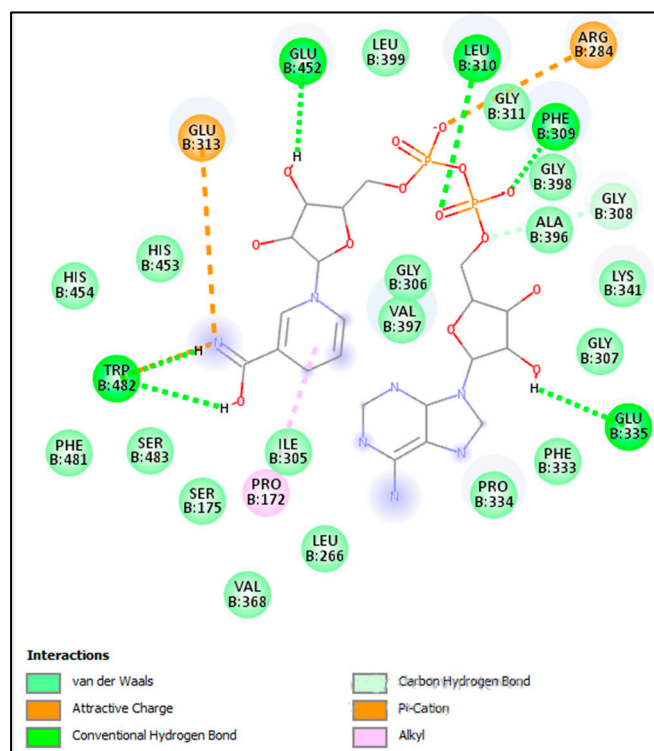

(a)

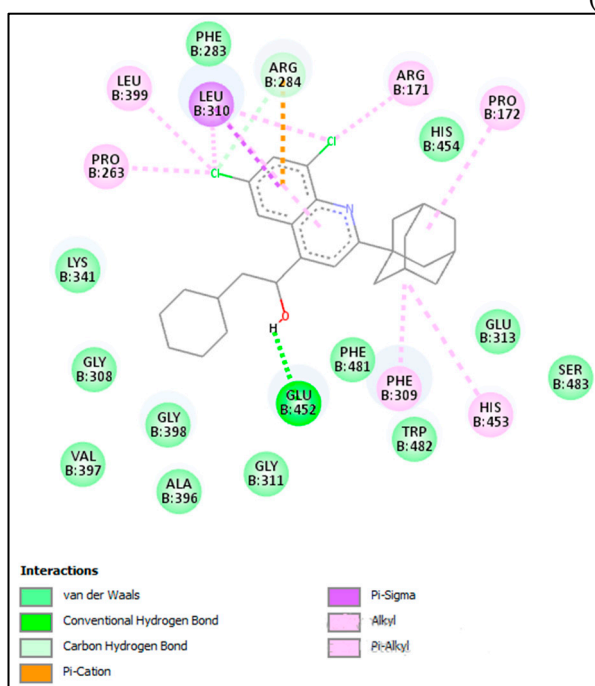

(b)

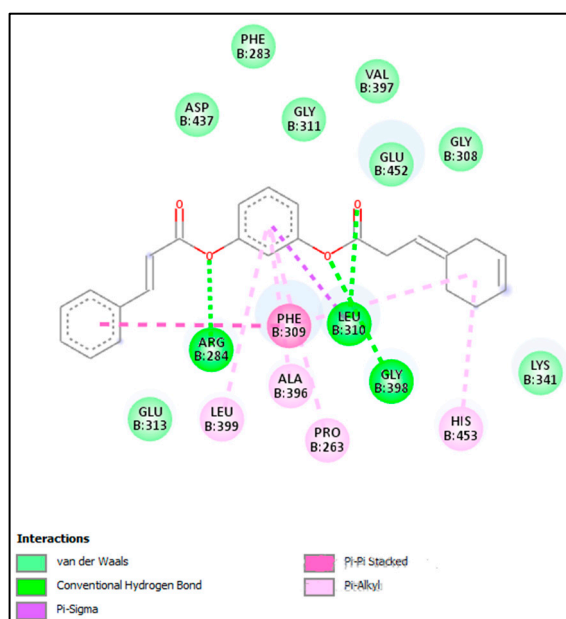

(c)

**Figure S12.** 2D interaction of Anticancer protein target (3GD4) and ligands: (a) NICOTINAMIDE-ADENINE-DINUCLEOTIDE (native ligand); (b) N-[.beta.-Hydroxy-.beta.-[4-[1-adamantyl]-6,8-dichloro]quinolyl]ethyl]piperidine; (c) 1,3-Phenylene, bis(3-phenylpropenoate)
